# Supplementary material
Source: PubMed Central journal article supplement (PMC5867249)
Supplement: NIHMS937076-supplement-Supp_info.pdf [file NIHMS937076-supplement-Supp_info.pdf]

SUPPLEMENTARY INFORMATION

**A widely conserved bacterial cytoskeletal component influences unique helical shape and motility of the spirochete *Leptospira biflexa***

**Katrina M. Jackson<sup>1</sup>, Cindi Schwartz<sup>2</sup>, Jenny Wachter<sup>1</sup>, Patricia A. Rosa<sup>1</sup>, Philip E. Stewart<sup>1\*</sup>**

*Laboratory of Bacteriology, National Institute of Allergy and Infectious Diseases, National Institutes of Health, Hamilton, Montana, USA<sup>1</sup>, Research Technologies Branch, National Institute of Allergy and Infectious Diseases, National Institutes of Health, Hamilton, Montana, USA<sup>2</sup>*

Table S1: Oligonucleotides used in this study

| Primer Name             | Sequence (5' – 3') <sup>1</sup>              | Function                                                                                      |
|-------------------------|----------------------------------------------|-----------------------------------------------------------------------------------------------|
| Lb1431.KO.MluI.RC       | acgcgtTTCCCCTTCTGTGAGAATC                    | Deletion of <i>lbbD</i>                                                                       |
| Lb1431.KO.Sall.F        | gtcgacGATTCGAAGGACTAACG                      | Deletion of <i>lbbD</i>                                                                       |
| Lb1431.Comp.NotI.F      | gcggccgcCTTGTACCTCAGTATGG                    | Amplification of <i>lbbD</i> and 441 basepairs upstream flanking region for deletion vector   |
| Lb1431.Comp.NotI.Rev    | gcggccgcCCGACGCGCAATGTCCG                    | Amplification of <i>lbbD</i> and 475 basepairs downstream flanking region for deletion vector |
| Lb1431-Sal-pflgB.Fuse.F | GATTCTCACAGAAGGGGAATACC<br>CGAGCTTCAAGGAAGAT | Gibson Assembly primer for combining flgKan with inverse PCR product for deletion vector      |
| Lb1431-Sal-Kan-fuse.RC  | CGTTAGTCCTTCGAATCTTAGAA<br>AAACTCATCGAGC     | Gibson Assembly primer for combining flgKan with inverse PCR product for deletion vector      |
| Lb1431.Expr.NdeI.F      | catatgGCAATAGGTAAGGATTCC                     | Amplification of <i>lbbD</i> for over-expression vector                                       |
| Lb1431.Expr.HindIII.RC  | aagtccCGTTAGTCCTTCGAATCTA                    | Amplification of <i>lbbD</i> for over-expression vector                                       |
| Lb1431.Comp.Bsph.F      | tcatgaTAGTTTGCTAATACCCGAGC                   | Amplification of <i>P<sub>flgB</sub></i> from pGSBLe24 for complementation                    |
| Lb1431.Comp.Bsph.Rev    | tcatgaGCCTAATTGAGAGAAGTTTC                   | Amplification of the spectinomycin-resistance marker from pGSBLe24 for complementation        |
| Lb1432.Comp.Anchor.F    | CATCTCCAAGGAAGCGGC                           | Determining where complement integration event occurred                                       |
| pGEM.Comp.Anchor.RC     | CGGTATTTACACCCGCATCAG                        | Determining where complement integration event occurred                                       |
| Lb1432.XhoI.T7.Rev      | CTCGAGGTCCTTCGAATCTAAAG<br>ATTTG             | Amplification of <i>lbbD</i> for expression in pET28a vector                                  |
| Lb1431.pet28.NcoI.F     | CCATGGCAATAGGTAAGGATTCC                      | Amplification of <i>lbbD</i> for expression in pET28a vector                                  |
| Lb117.rtPCR.F           | CCTCGAAACCACAGGAAAGG                         | qPCR Primer                                                                                   |
| Lb117.rtPCR.Probe       | CGATACAGATATCAAAGCGCGTG<br>TGGT <sup>2</sup> | qPCR Probe                                                                                    |
| Lb117.rtPCR.Rev         | TCGAGTCTGCAGCTTGAAAG                         | qPCR Primer                                                                                   |
| Lb122.rtPCR.F           | ATATCAAGGCTGGGACTGTTG                        | qPCR Primer                                                                                   |
| Lb122.rtPCR.Probe       | GGAACGTTACCGCAACACAAAG<br>GT <sup>2</sup>    | qPCR Probe                                                                                    |
| Lb122.rtPCR.Rev         | TGTTTCCCTGTACCTTTCCAG                        | qPCR Primer                                                                                   |
| Lb106.rtPCR.F           | ACCTTCATGGCAAACATCATC                        | qPCR Primer                                                                                   |
| Lb106.rtPCR.Probe       | CGATGAAACAGGTGATGTGGAA<br>GCAGA <sup>2</sup> | qPCR Probe                                                                                    |
| Lb106.rtPCR.Rev         | ACAACCAAACCTCCCCACTTC                        | qPCR Primer                                                                                   |
| Lb134.rtPCR.F           | AGATGCACTCGTCATTGGAG                         | qPCR Primer                                                                                   |
| Lb134.rtPCR.Probe       | AGAAGTCATTGTCTCCGGAACCC<br>TCA <sup>2</sup>  | qPCR Probe                                                                                    |
| Lb134.rtPCR.Rev         | CCAGTTTCACTTCGTTTTTCGG                       | qPCR Primer                                                                                   |
| Lb146.rtPCR.F           | GGCGAGTGTGATTGTAGAAGG                        | qPCR Primer                                                                                   |
| Lb146.rtPCR.Probe       | CGTAGGGAACGTGACGGCAAGA<br>A <sup>2</sup>     | qPCR Probe                                                                                    |

|                 |                                             |                          |
|-----------------|---------------------------------------------|--------------------------|
| Lb146.rtPCR.Rev | GGATTTTGGGAAGTGGGTAGGAG                     | qPCR Primer              |
| 1432.F          | TTGTATGGCAGTGGGTATTCC                       | qPCR Primer              |
| 1432.R          | TCCCGTCAGTAAGTTTAAGGC                       | qPCR Primer              |
| 1432.Probe      | TGGTAGGCGGAAGAAAAGGTTT<br>GTT <sup>2</sup>  | qPCR Probe               |
| 1430.F          | CCCGTTCCTACCCACAATAC                        | qPCR Primer              |
| 1430.R          | ATTTCCATAGCCACCCATCC                        | qPCR Primer              |
| 1430.Probe      | CCCTTGACCTACGTGCCAATTAC<br>GAA <sup>2</sup> | qPCR Probe               |
| FlaB.Lb.F.qPCR  | CTGCTTACAGGAGCGTTTGCT                       | qPCR Primer <sup>3</sup> |
| FlaB.Lb.RC.qPCR | TGGTGCATGTTAGCTCCAATATG                     | qPCR Primer <sup>3</sup> |
| FlaB.Lb.Probe   | ACTCAACCCAAGTCTAGTATGT<br>GGT <sup>2</sup>  | qPCR Probe <sup>3</sup>  |

<sup>1</sup> Lower-case letters designate restriction enzymes.

<sup>2</sup> TaqMan probes were labeled with FAM (6-carboxyfluorescein) at the 5'-end and with TAMRA (6-carboxytetramethylrhodamine) at the 3'-end.

<sup>3</sup> Previously published in Stewart et al. BMC Microbiology 2012, 12:290.

## Supplemental Figure 1

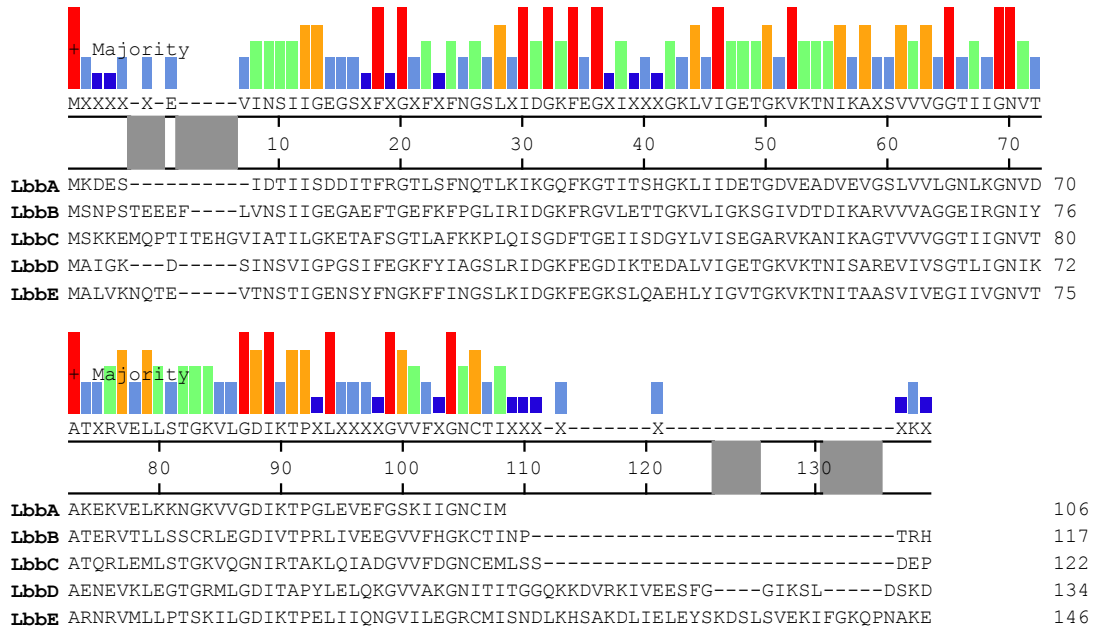

| Bactofilin  | % Identity to LbbD |
|-------------|--------------------|
| <b>LbbA</b> | 33                 |
| <b>LbbB</b> | 39                 |
| <b>LbbC</b> | 30                 |
| <b>LbbE</b> | 43                 |

**Fig. S1. Amino acid sequence alignment of the 5 bactofilin proteins of *L. biflexa* and their sequence identity compared to LbbD.** Colors above the alignment indicate the strength of residue conservation (with red being conserved in all sequences and dark blue being the least conserved).

## Supplemental Videos

**Fig. S2. Dark field video microscopy of wild type *L. biflexa* translating in 0.5% methyl cellulose.** Methyl cellulose was added to a wild type *Leptospira* culture to a final concentration of 0.5% and videos recorded on a Nikon Eclipse 80i using a dark field condenser with Nikon NIS-Elements AR 4.20.02 software at 4 fps.

**Fig. S3. Dark field video microscopy of  $\Delta$ LBBD translating in 0.5% methyl cellulose.** Methyl cellulose was added to a culture of the mutant strain  $\Delta$ LBBD to a final concentration of 0.5% and videos recorded on a Nikon Eclipse 80i using a dark field condenser with Nikon NIS-Elements AR 4.20.02 software at 4 fps.
